# Supplementary material for: ForamEcoGEnIE 2.0: incorporating symbiosis and spine traits into a trait-based global planktic foraminiferal model
Source: Copernicus journal article supplement (doi:10.5194/gmd-16-813-2023), 2023-02-02
Supplement: Supplementary file 1 [file gmd-16-813-2023-supplement.pdf]

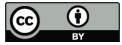

*Supplement of*

## **ForamEcoGENIE 2.0: incorporating symbiosis and spine traits into a trait-based global planktic foraminiferal model**

**Rui Ying et al.**

*Correspondence to:* Rui Ying ([rui.ying@bristol.ac.uk](mailto:rui.ying@bristol.ac.uk))

The copyright of individual parts of the supplement might differ from the article licence.

**Table S1 Collected studies in plankton net tow data compilation**

| Literature                    | Source                                                                                                        | Region                            |
|-------------------------------|---------------------------------------------------------------------------------------------------------------|-----------------------------------|
| Kuroyanagi and Kawahata, 2004 | <a href="https://doi.org/10.1016/j.marmicro.2004.06.001">https://doi.org/10.1016/j.marmicro.2004.06.001</a>   | Japan Seas                        |
| Sousa et al., 2014            | <a href="https://doi.org/10.1016/j.csr.2013.11.027">https://doi.org/10.1016/j.csr.2013.11.027</a>             | SE Brazilian margin               |
| Bahr et al., 2013             | <a href="https://doi.org/10.1016/j.epsl.2013.09.036">https://doi.org/10.1016/j.epsl.2013.09.036</a>           | Caribbean                         |
| Schmuker & Schiebel, 2002     | <a href="https://doi.org/10.1016/S0377-8398(02)00082-8">https://doi.org/10.1016/S0377-8398(02)00082-8</a>     | Caribbean                         |
| Ortiz, Mix & Collier (1995)   | <a href="https://doi.org/10.1029/95PA02088">https://doi.org/10.1029/95PA02088</a>                             | California Current                |
| Bé et al. (1985)              | <a href="https://doi.org/10.1016/0377-8398(85)90002-7">https://doi.org/10.1016/0377-8398(85)90002-7</a>       | Panama Basin                      |
| Ufkes et al. (1998)           | <a href="https://doi.org/10.1016/S0377-8398(97)00032-7">https://doi.org/10.1016/S0377-8398(97)00032-7</a>     | ES Atlantic                       |
| Bergami et al., (2009)        | <a href="https://doi.org/10.1016/j.marmicro.2009.06.007">https://doi.org/10.1016/j.marmicro.2009.06.007</a>   | Ross Sea                          |
| Schiebel and Hemleben (2000)  | <a href="https://doi.org/10.1016/S0967-0645(00)00008-4">https://doi.org/10.1016/S0967-0645(00)00008-4</a>     | eastern North Atlantic (BIOTRANS) |
| Schiebel et al., 2002         | <a href="https://doi.org/10.1016/S0967-0645(02)00141-8">https://doi.org/10.1016/S0967-0645(02)00141-8</a>     | Azores Front                      |
| Schiebel et al., 2004         | <a href="https://doi.org/10.1016/j.marmicro.2004.02.001">https://doi.org/10.1016/j.marmicro.2004.02.001</a>   | Arabian Sea                       |
| Rebotim et al., 2017          | <a href="https://doi.org/10.5194/bg-14-827-2017">https://doi.org/10.5194/bg-14-827-2017</a>                   | eastern North Atlantic            |
| Meilland et al., 2020         | <a href="https://doi.org/10.5194/bg-17-1437-2020">https://doi.org/10.5194/bg-17-1437-2020</a>                 | Barents Sea                       |
| Lessa et al., 2020            | <a href="https://doi.org/10.5194/bg-17-4313-2020">https://doi.org/10.5194/bg-17-4313-2020</a>                 | subtropical South Atlantic        |
| Taylor et al., 2018           | <a href="https://doi.org/10.1016/j.quascirev.2018.05.006">https://doi.org/10.1016/j.quascirev.2018.05.006</a> | North Pacific                     |
| Rippert et al., 2016          | <a href="https://doi.org/10.1016/j.marmicro.2016.08.004">https://doi.org/10.1016/j.marmicro.2016.08.004</a>   | western Pacific warm pool         |
| Tolderlund and Bé, 1971       | <a href="https://doi.org/10.2307/1485143">https://doi.org/10.2307/1485143</a>                                 | western North Atlantic            |
| Meilland, 2015                | PhD thesis                                                                                                    | Southern Ocean                    |

**Table S2 Collected studies in sediment trap data compilation**

| Literature           | Source                                                                                                      | Region      |
|----------------------|-------------------------------------------------------------------------------------------------------------|-------------|
| Zaric et al., 2005   | <a href="https://doi.org/10.1016/j.marmicro.2005.01.002">https://doi.org/10.1016/j.marmicro.2005.01.002</a> | global      |
| Chapman et al., 2010 | <a href="https://doi.org/10.1029/2008PA001708">https://doi.org/10.1029/2008PA001708</a>                     | NE Atlantic |
| Mohtadi et al., 2009 | <a href="https://doi.org/10.1029/2008PA001636">https://doi.org/10.1029/2008PA001636</a>                     | Java sea    |

**Table S3 Model parameter value and units adapted from EcoGENIE (Ward et al., 2018)**

| Parameter              | Description                            | Value                      | Unit                                                                          | Equation |
|------------------------|----------------------------------------|----------------------------|-------------------------------------------------------------------------------|----------|
| <b>Cell Quota</b>      |                                        |                            |                                                                               |          |
| $Q_c$                  | Cell carbon content                    | $1.45E-11 \times V^{0.88}$ | mmol C cell <sup>-1</sup>                                                     |          |
| $Q_{min}^P$            | Minimum P/C quota ratio                | 3.3E-3                     | mmol P (mmol C) <sup>-1</sup>                                                 | 2        |
| $Q_{max}^P$            | Maximum P/C quota ratio                | 1.1E-2                     | mmol P (mmol C) <sup>-1</sup>                                                 | 2        |
| $Q_{min}^{Fe}$         | Minimum Fe/C quota ratio               | 1.0E-6                     | mmol Fe (mmol C) <sup>-1</sup>                                                | 2        |
| $Q_{max}^{Fe}$         | Maximum Fe/C quota ratio               | 4.0E-6                     | mmol Fe (mmol C) <sup>-1</sup>                                                | 2        |
| <b>Nutrient uptake</b> |                                        |                            |                                                                               |          |
| $V_{PO_4}^m$           | Maximum PO <sub>4</sub> uptake rate    | $4.4E-2 \times V^{0.06}$   | mmol P (mmol C) <sup>-1</sup> d <sup>-1</sup>                                 | 12       |
| $V_{Fe}^m$             | Maximum Fe uptake rate                 | $1.4E-4 \times V^{-0.09}$  | mmol Fe (mmol C) <sup>-1</sup> d <sup>-1</sup>                                | 12       |
| $\alpha_{PO_4}$        | Affinity to PO <sub>4</sub>            | $1.1 \times V^{-0.35}$     | m <sup>3</sup> (mmol C) <sup>-1</sup> d <sup>-1</sup>                         | 12       |
| $\alpha_{Fe}$          | Affinity to Fe                         | $0.175 \times V^{-0.36}$   | m <sup>3</sup> (mmol C) <sup>-1</sup> d <sup>-1</sup>                         | 12       |
| <b>Temperature</b>     |                                        |                            |                                                                               |          |
| A                      | Temperature dependency                 | 0.05                       |                                                                               | 5        |
| $T_{ref}$              | Reference temperature                  | 20                         | °                                                                             | 5        |
| <b>Loss terms</b>      |                                        |                            |                                                                               |          |
| $\gamma_{basal}$       | Respiration loss                       |                            | mmol C (mmol P) <sup>-1</sup> d <sup>-1</sup>                                 | 4        |
| $m_{basal}$            | Mortality loss                         |                            | d <sup>-1</sup>                                                               | 6        |
| <b>Photosynthesis</b>  |                                        |                            |                                                                               |          |
| $P_a$                  | Maximum photosynthesis rate definition | 3.08                       |                                                                               | 13       |
| $P_b$                  |                                        | 5                          |                                                                               | 13       |
| $P_c$                  |                                        | -3.08                      |                                                                               | 13       |
| $Q_{chl}^m$            | maximum Chl <i>a</i> /P ratio          | 48                         | mg Chl <i>a</i> (mmol P) <sup>-1</sup>                                        | 16       |
| $\alpha$               | initial P-I curve slope                | 3.83E-7                    | mmol C (mg Chl <i>a</i> ) <sup>-1</sup> (μEin m <sup>-2</sup> ) <sup>-1</sup> | 16       |
| <b>Grazing</b>         |                                        |                            |                                                                               |          |
| K                      | Half-saturation concentration          | 5.0                        | mmol C m <sup>-3</sup>                                                        | 7        |

|                    |                                    |                         |                             |    |
|--------------------|------------------------------------|-------------------------|-----------------------------|----|
| $\sigma$           | Prey range                         | 0.5                     |                             | 10 |
| $V$                | Optimal predator:prey size ratio   | 10                      |                             | 10 |
| $\wedge$           | Grazing refuge strength            | -1                      | (mmol C m <sup>-3</sup> )-1 | 7  |
| $G_m$              | Maximum grazing rate               | $21.9 \times V^{-0.16}$ | d <sup>-1</sup>             | 7  |
| <b>Carbon flux</b> |                                    |                         |                             |    |
| $\beta_{\max}$     | maximum DOM fraction               | 0.8                     |                             | 22 |
| $\beta_{\min}$     | minimum DOM fraction               | 0.4                     |                             | 22 |
| $\beta_s$          | Plankton size at which DOM/POM = 1 | 100                     | $\mu\text{m}$               | 22 |

**Table S4 Functional group classification of planktic foraminifer species. Taxonomy is following mikrotax (Young et al. 2017) and symbiosis follows Takagi et al., (2019) and Schiebel and Hemleben, (2017)**

| Name                                 | Symbiosis | Spinose | Remark                                                                                          |
|--------------------------------------|-----------|---------|-------------------------------------------------------------------------------------------------|
| <i>Dentigloborotalia anfracta</i>    | No        | No      |                                                                                                 |
| <i>Globorotalia cavernula</i>        | No        | No      |                                                                                                 |
| <i>Globorotalia crassaformis</i>     | No        | No      |                                                                                                 |
| <i>Globorotalia hirsuta</i>          | No        | No      | Synonyms: <i>Hirsutella hirsuta</i>                                                             |
| <i>Globorotalia menardii</i>         | Yes       | No      | Symbionts facultative                                                                           |
| <i>Globorotalia scitula</i>          | No        | No      | Synonyms: <i>Hirsutella scitula</i>                                                             |
| <i>Globorotalia truncatulinoides</i> | No        | No      | Synonyms: <i>Truncorotalia truncatulinoides</i>                                                 |
| <i>Globorotalia tumida</i>           | No        | No      |                                                                                                 |
| <i>Globorotalia unguolata</i>        | No        | No      |                                                                                                 |
| <i>Globorotalia theyeri</i>          | No        | No      |                                                                                                 |
| <i>Globoconella inflata</i>          | Yes       | No      | Symbionts facultative. Synonyms: <i>Globorotalia inflata</i> ;                                  |
| <i>Neogloboquadrina dutertrei</i>    | Yes       | No      | Symbionts facultative                                                                           |
| <i>Neogloboquadrina incompta</i>     | No        | No      | Previously called <i>Neogloboquadrina pachyderma</i> (right)                                    |
| <i>Neogloboquadrina pachyderma</i>   | No        | No      | Previously called <i>Neogloboquadrina pachyderma</i> (left)                                     |
| <i>Pulleniatina obliquiloculata</i>  | Yes       | No      | Symbionts facultative                                                                           |
| <i>Globoquadrina conglomerata</i>    | No        | No      |                                                                                                 |
| <i>Globorotaloides hexagonus</i>     | No        | No      |                                                                                                 |
| <i>Berggrenia pumilio</i>            | No        | No      |                                                                                                 |
| <i>Globigerina bulloides</i>         | No        | Yes     | Symbiont-barren spinose                                                                         |
| <i>Globigerina falconensis</i>       | Yes       | Yes     |                                                                                                 |
| <i>Globigerinoides conglobatus</i>   | Yes       | Yes     |                                                                                                 |
| <i>Globigerinoides ruber</i>         | Yes       | Yes     | Darling and Wade, (2008). Include two subspecies <i>G. ruber</i> pink and <i>G. ruber</i> white |

|                                     |              |              |                                                                                                 |
|-------------------------------------|--------------|--------------|-------------------------------------------------------------------------------------------------|
| <i>Trilobatus sacculifer</i>        | Yes          | Yes          | Synonyms: <i>Globigerinoides sacculifer</i> ; <i>Globigerinoides elongatus</i>                  |
| <i>Globigerinoides tenellus</i>     | No           | Yes          | spinose without symbionts (Aze et al., 2011); Synonyms <i>Globoturborotalita tenellus</i>       |
| <i>Orbulina universa</i>            | Yes          | Yes          |                                                                                                 |
| <i>Beella digitata</i>              | Yes          | Yes          | unclear as subthermocline dwelling, Coxall et al 2007; Synonyms: <i>Globigerinella digitata</i> |
| <i>Globigerinella siphonifera</i>   | Yes          | Yes          | Synonyms: <i>Globigerina aequilateralis</i>                                                     |
| <i>Globigerinella calida</i>        | Yes          | Yes          | Synonyms: <i>Globigerina calida</i>                                                             |
| <i>Globigerinella adamsi</i>        | Yes          | Yes          |                                                                                                 |
| <i>Turborotalita quinqueloba</i>    | No           | No           |                                                                                                 |
| <i>Turborotalita humilis</i>        | Yes          | Yes          |                                                                                                 |
| <i>Globoturborotalita rubescens</i> | Yes          | Yes          |                                                                                                 |
| <i>Sphaeroidinella dehiscens</i>    | Yes          | Yes          |                                                                                                 |
| <i>Candeina nitida</i>              | Yes          | No           | Symbionts facultative                                                                           |
| <i>Globigerinita glutinata</i>      | Yes          | No           | Symbionts facultative                                                                           |
| <i>Globigerinita uvula</i>          | Yes          | No           | Symbionts facultative; (Takagi et al., 2019, 2020)                                              |
| <i>Globigerinita minuta</i>         | No           | No           |                                                                                                 |
| <i>Tenuitella iota</i>              | No           | No           |                                                                                                 |
| <i>Hastigerina pelagica</i>         | No           | Yes          | Symbiont-barren spinose                                                                         |
| <i>Hastigerinella digitata</i>      | No           | Yes          | sister species of <i>H.pelagica</i> ; symbiont bearing Takagi et al. (2019)                     |
| <i>Streptochilus globigerus</i>     | Undetermined | Undetermined | very rare, limited information                                                                  |
| <i>Tenuitella compressa</i>         | Undetermined | Undetermined | Synonyms: <i>Tenuitella fleisheri</i> (synonyms under discussion)                               |
| <i>Tenuitella fleisheri</i>         | Undetermined | Undetermined | Synonyms: <i>Tenuitella compressa</i>                                                           |
| <i>Tenuitella parkerae</i>          | Undetermined | Undetermined | limited information                                                                             |
| <i>Turborotalita clarkei</i>        | Undetermined | Yes          |                                                                                                 |
| <i>Globigerinella radians</i>       | Yes          | Yes          | very close to <i>G.siphonifera</i>                                                              |
| <i>Orcadia riedeli</i>              | Undetermined | Undetermined | Rare species, limited information, (Schiebel et al., 2017)                                      |
| <i>Globorotalia flexuosa</i>        | No           | No           | synonyms: <i>Globorotalia tumida flexuosa</i>                                                   |

**Table S5 Root Mean Square Error (RMSE) of our model with optimal parameters for inter-model comparison**

|                                  | Biomass<br>(mmol C<br>m <sup>-3</sup> ) | Carbon<br>Export<br>(mmol C<br>m <sup>-2</sup> d <sup>-1</sup> ) | Relative<br>Abundance | Column<br>Total |
|----------------------------------|-----------------------------------------|------------------------------------------------------------------|-----------------------|-----------------|
| symbiont-barren non-spinose      | 0.03                                    | 0.09                                                             | 0.19                  | 0.31            |
| symbiont-barren spinose          | 0.02                                    | 0.04                                                             | 0.12                  | 0.18            |
| symbiont-facultative non-spinose | 0.01                                    | 0                                                                | 0.34                  | 0.35            |
| symbiont-obligate spinose        | 0.01                                    | 0.02                                                             | 0.42                  | 0.46            |
| Row Total                        | 0.06                                    | 0.16                                                             | 1.08                  | 1.3             |

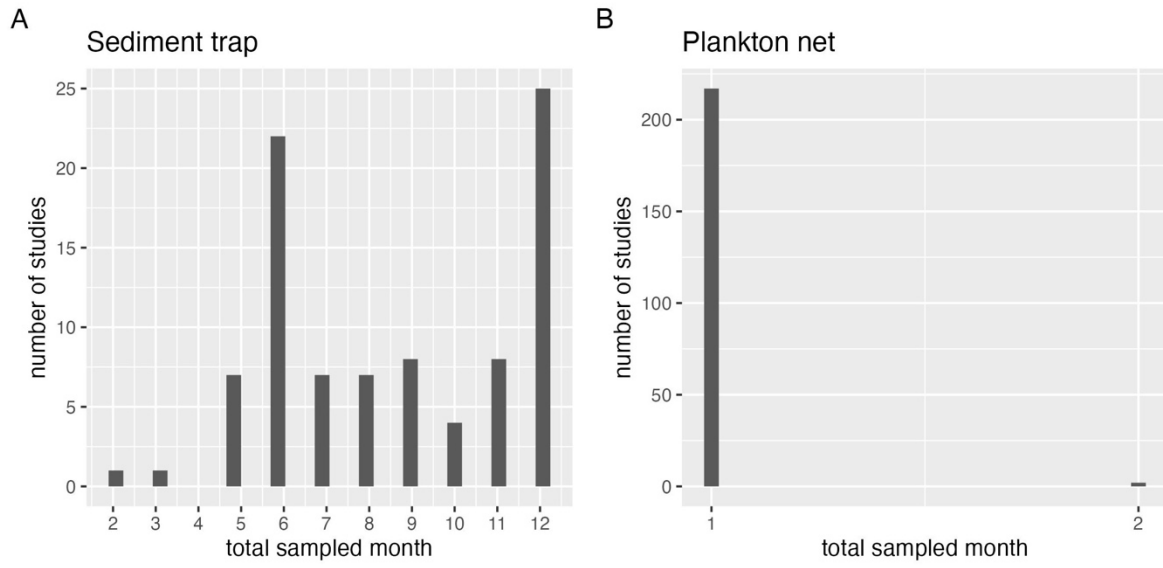

Figure S1. A histogram of sampled duration in collected sediment trap and plankton net data. The sediment traps tend to record seasonal signatures while plankton nets represent sampling of a single record of a few hours (the only two-month sampled data should be a result of sampling at the end of month).



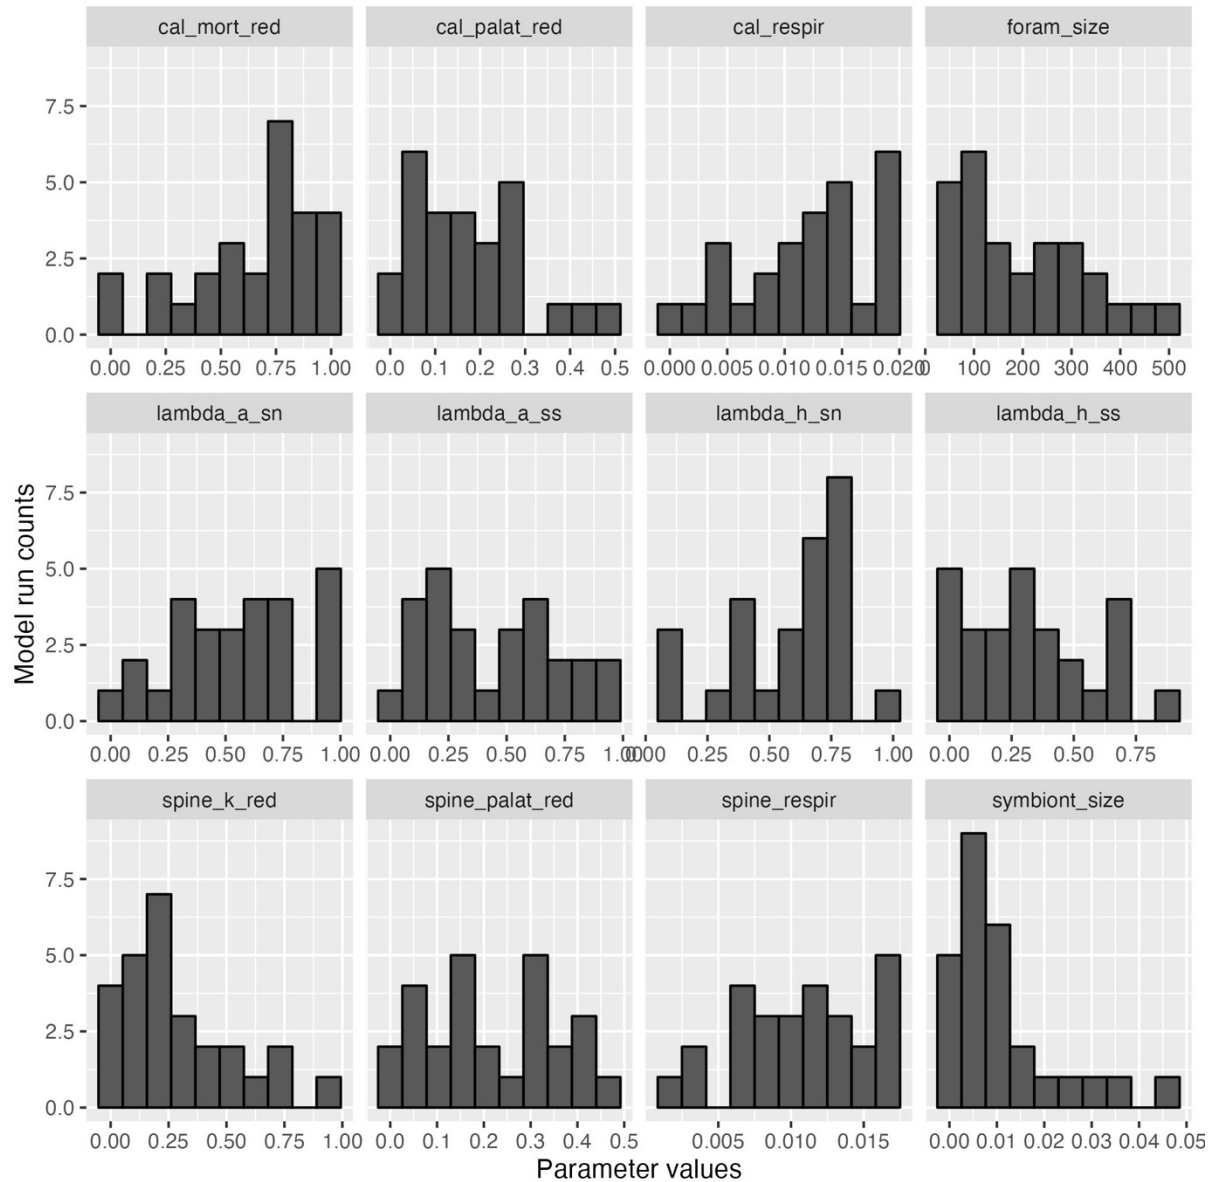

Figure S2. Number of runs for each parameters (linking to Cluster "A" in Figure 2) associated with low annual mean export production of foraminifers ( $< 1 \text{ mmol C m}^{-2} \text{ d}^{-1}$ ) and relatively high relative abundance M-score ( $\geq 0.45$ ). Cluster A achieves the highest (i.e., the best) relative-abundance M-score with good biomass and POC export predictions. Cluster A is also the only cluster with low foraminifer export, suggesting that low export is required to have a high total M-score. Parameter abbreviations are as follows: cal, calcification; mort, mortality; red, reduction strength; palat: palatability; respir, respiration; a, autotroph; h, heterotroph. ss, symbiont-obligate spinose foram, sn, symbiont-facultative non-spinose foram

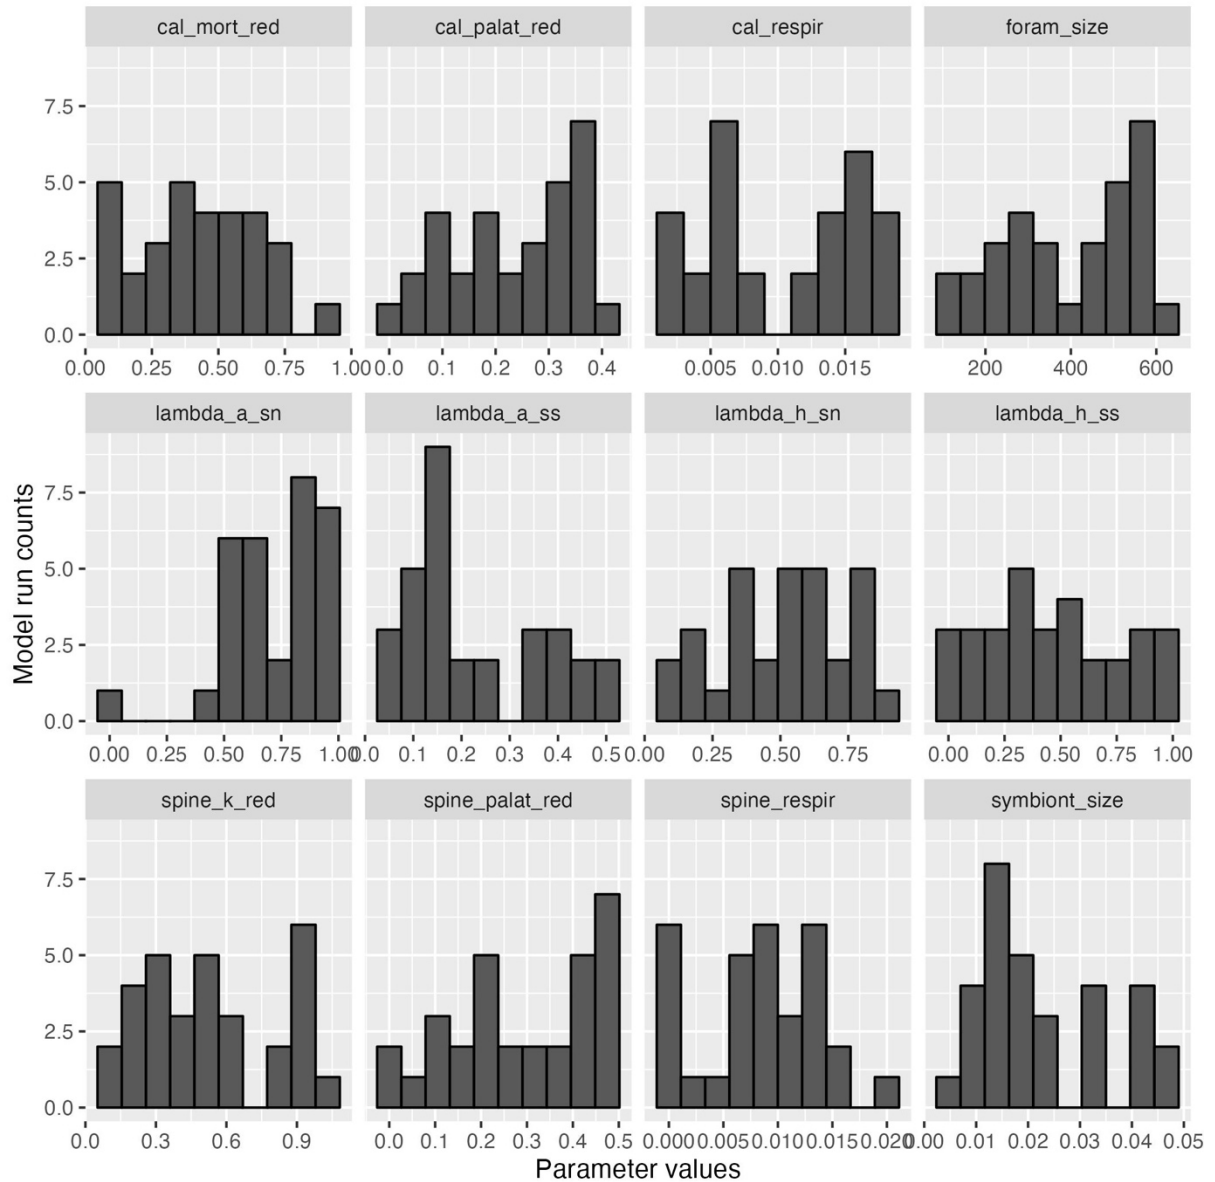

Figure S3. Same histogram as Figure S3 but associated with negative relative abundance M-score ( $\leq -0.3$ , proxy of Cluster "D" in Figure 2). The runs with negative scoring (Cluster D) have large foraminifer size (peaking in 500-600  $\mu\text{m}$ ), over protection from grazing. These results suggest the crucial role of foraminifer body size and calcification trait in matching observed data.

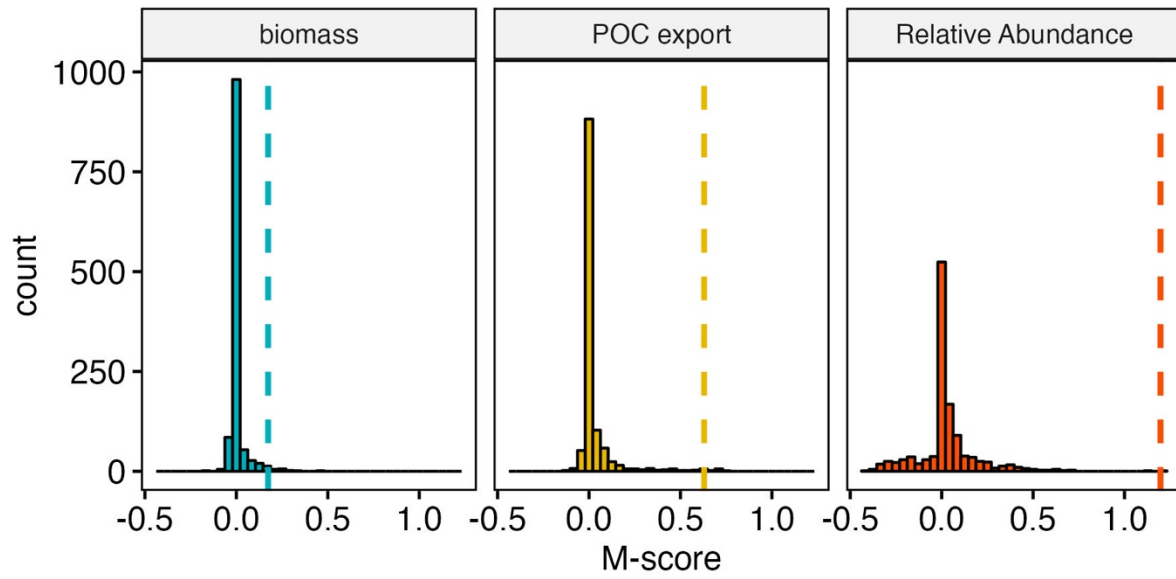

Figure S4. Variable-based M-score distribution histogram of global sensitivity analysis. Dashed line is the M-score of the run with best fit with plankton net (biomass), sediment trap (POC export) and sediment core-top (relative abundance).

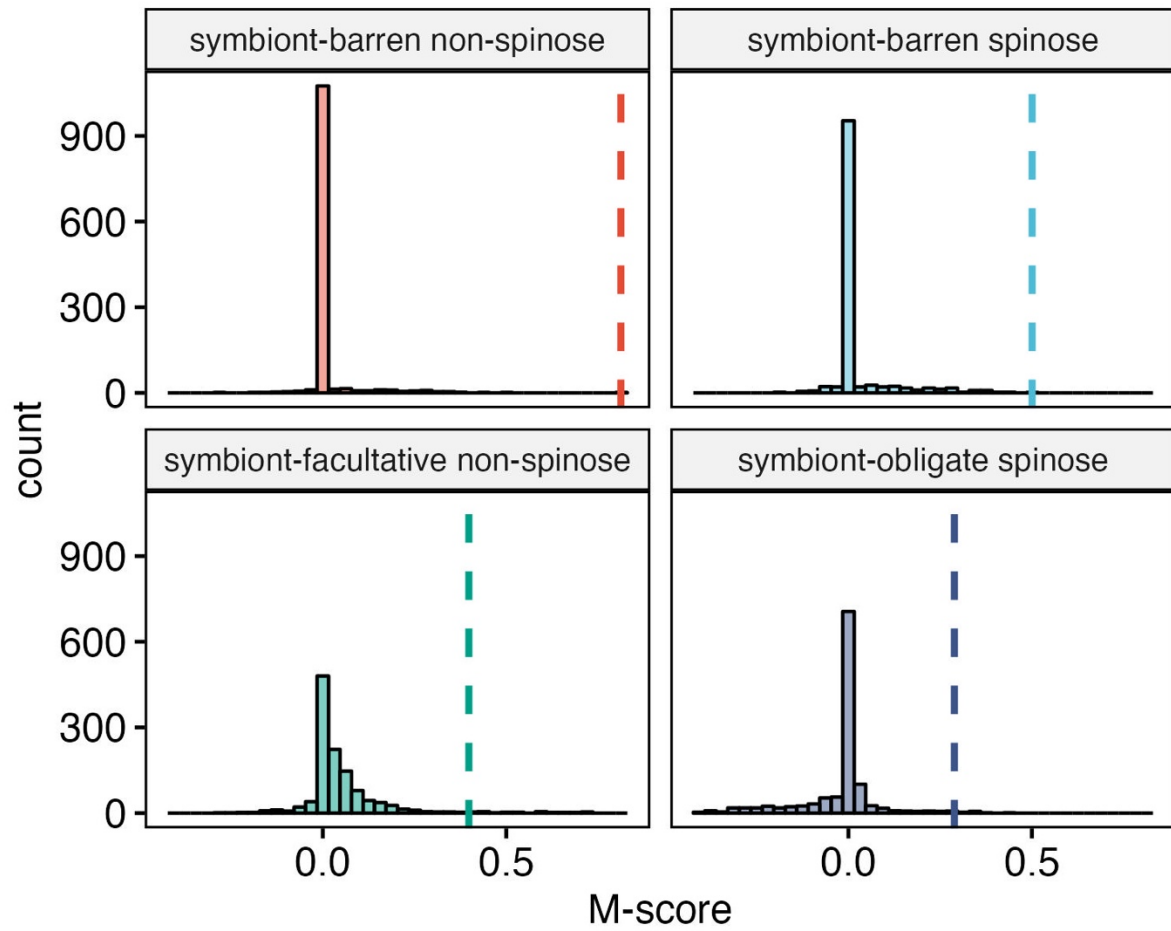

Figure S5. Foraminiferal group-based M-score distribution histogram of global sensitivity analysis. Dashed line is the M-score of optimal parameters.

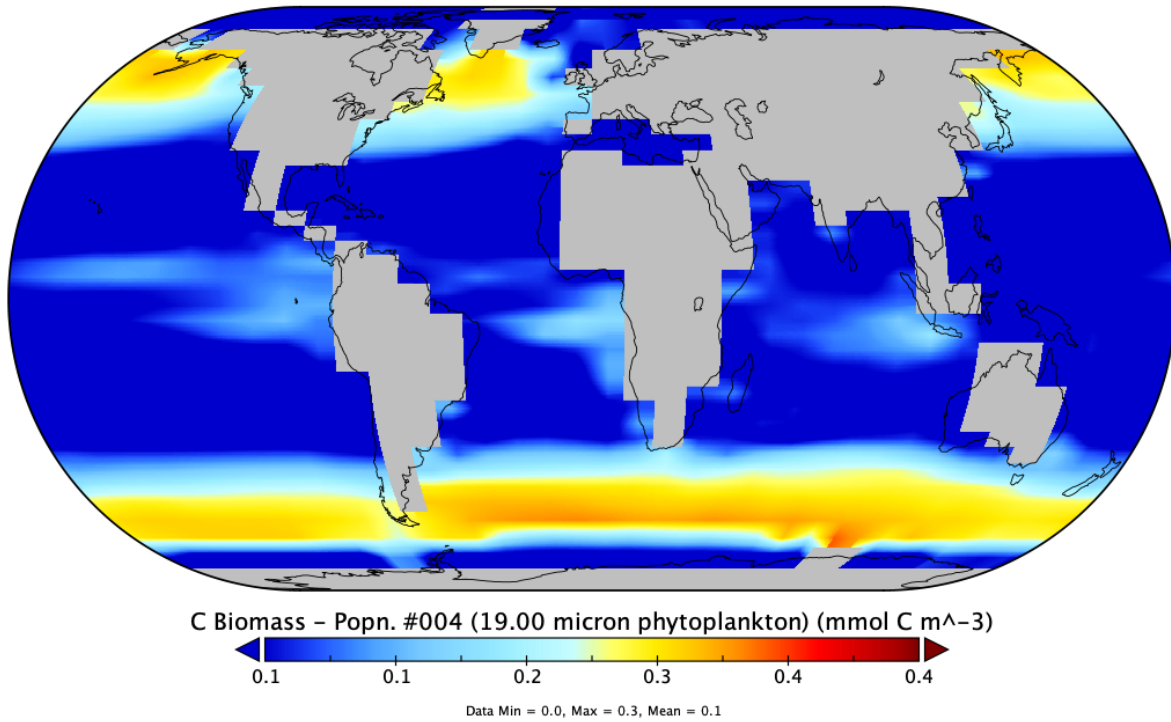

Figure S6 The biomass distribution of the 19  $\mu\text{m}$  phytoplankton which is the “favourite” food of foraminifer given optimal predator: prey size ratio of 10. The biogeographical similarity between this group and non-symbiont foraminifer indicates that foraminifer distribution mostly resembles their food.

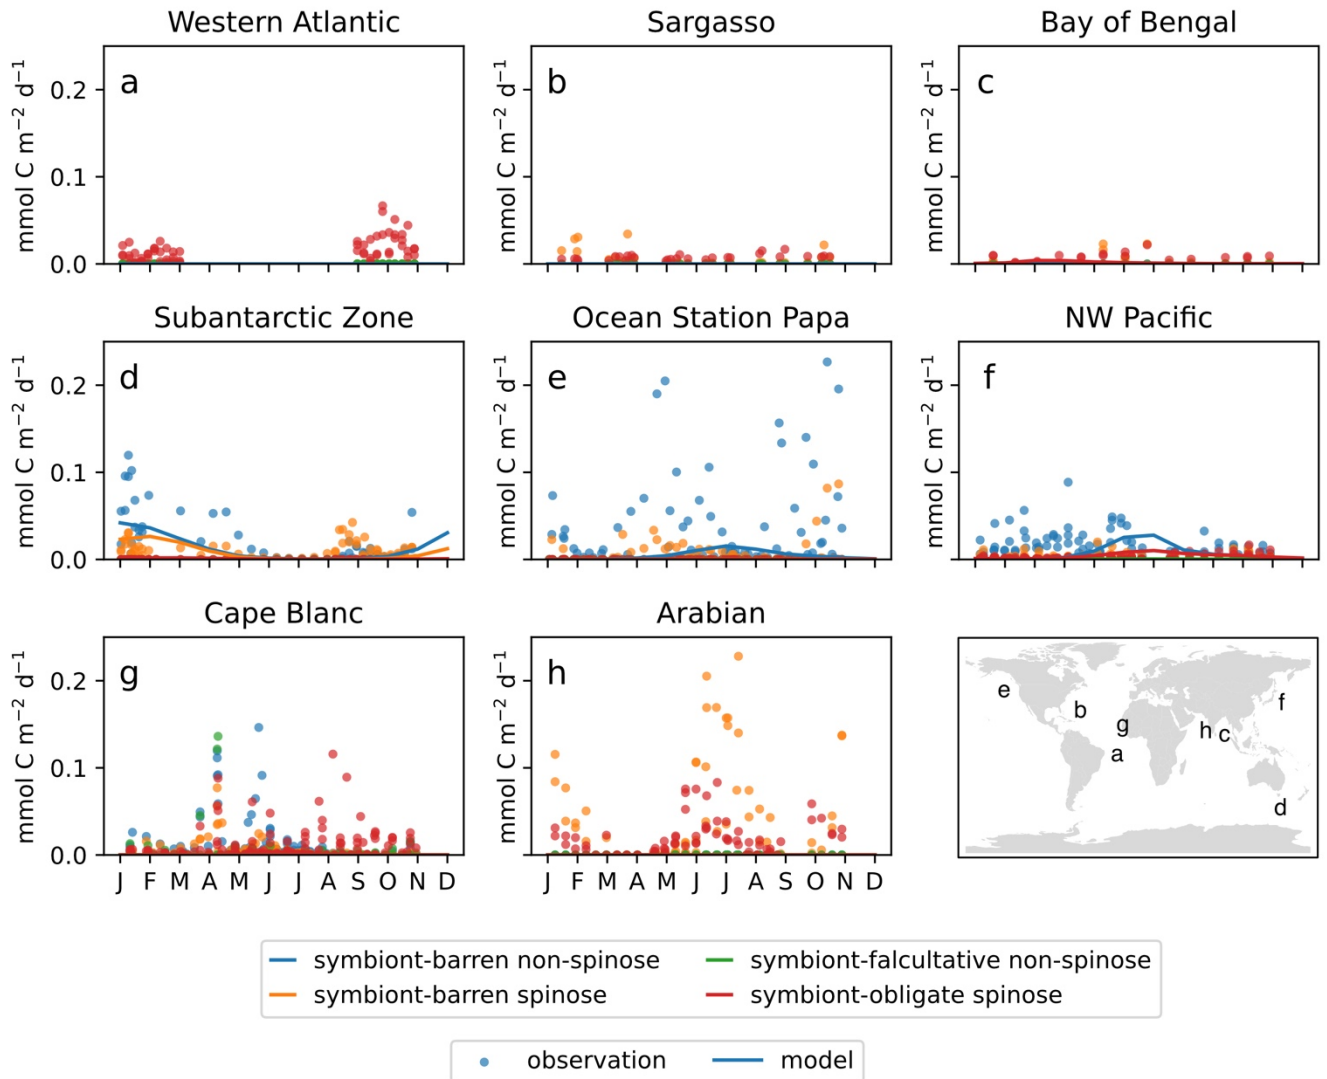

Figure S7. POC export seasonal comparison between the model (lines) and sediment trap data (dots) (mmol C m<sup>-2</sup> d<sup>-1</sup>) for the selected locations (shown in the map with corresponding letter). We selected the locations with the most data points. Note that model foraminifera export underestimates observations at most locations and the line is therefore not visible in some panels (a, b, c, g, and h). We ignored interannual variability and focussed on the observed monthly average.

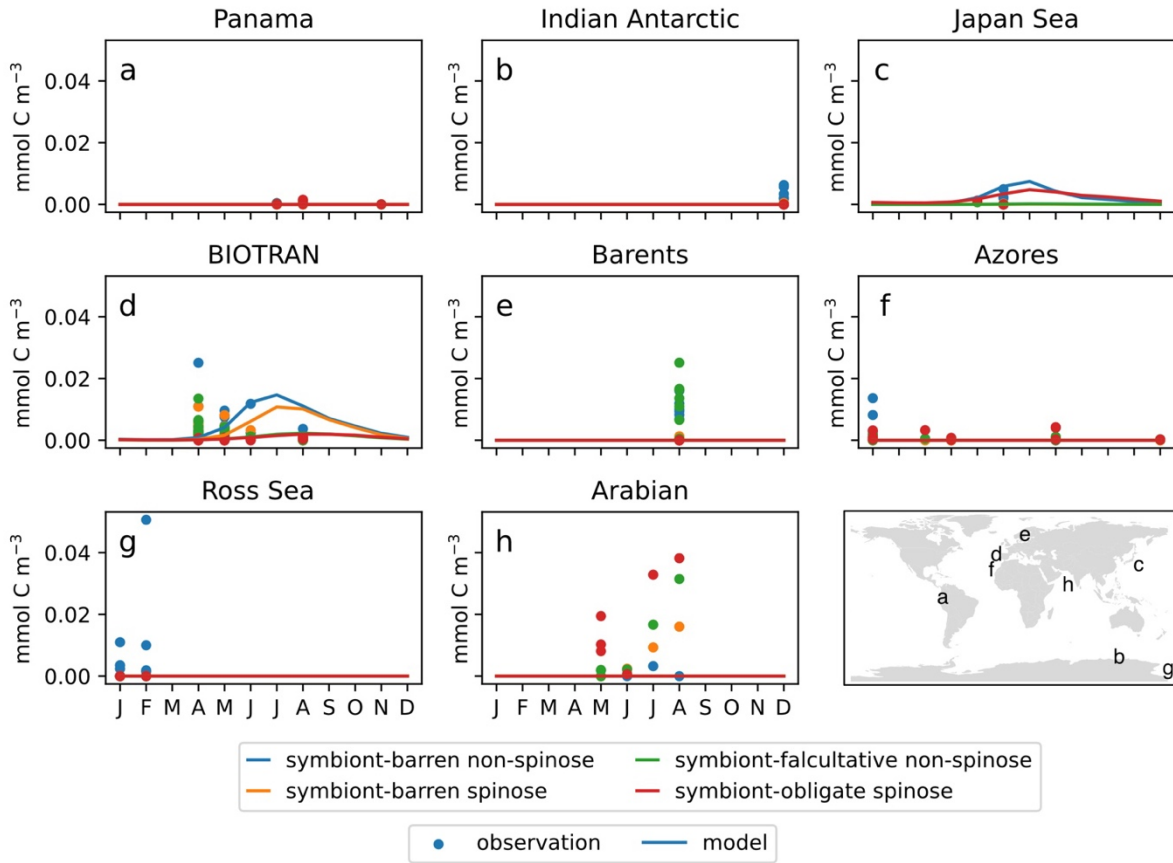

Figure S8. Biomass seasonal comparison between the model (lines) and plankton net data (dots) ( $\text{mmol C m}^{-3}$ ) in selected locations (shown in the map with corresponding letter). We selected the locations with the most data points

## References

- Darling, K. F. and Wade, C. M.: The genetic diversity of planktic foraminifera and the global distribution of ribosomal RNA genotypes, *Marine Micropaleontology*, 67, 216–238, <https://doi.org/10/fdg3pd>, 2008.
- Schiebel, R. and Hemleben, C.: *Planktic Foraminifers in the Modern Ocean*, Springer Berlin Heidelberg, Berlin, Heidelberg, <https://doi.org/10.1007/978-3-662-50297-6>, 2017.
- Schiebel, R., Spielhagen, R. F., Garnier, J., Hagemann, J., Howa, H., Jentzen, A., Martínez-García, A., Meilland, J., Michel, E., Repschläger, J., Salter, I., Yamasaki, M., and Haug, G.: Modern planktic foraminifers in the high-latitude ocean, *Marine Micropaleontology*, 136, 1–13, <https://doi.org/10/gckqmg>, 2017.
- Takagi, H., Kimoto, K., Fujiki, T., Saito, H., Schmidt, C., Kucera, M., and Moriya, K.: Characterizing photosymbiosis in modern planktonic foraminifera, *Biogeosciences*, 16, 3377–3396, <https://doi.org/10/gj35bq>, 2019.
- Takagi, H., Kurasawa, A., and Kimoto, K.: Observation of asexual reproduction with symbiont transmission in planktonic foraminifera, *Journal of Plankton Research*, 42, 403–410, <https://doi.org/10/gkr66r>, 2020.
- Young, J.R., Wade, B.S., & Huber B.T. (eds) pforams@mikrotax website. 21 Apr. 2017. URL: <http://www.mikrotax.org/pforams>
